# Supplementary material
Source: PubMed Central journal article supplement (PMC4277698)
Supplement: NIHMS610240-supplement-03.pdf [file NIHMS610240-supplement-03.pdf]

# SUPPLEMENTARY DATA 3

## Supplementary data S3.1 Score form Delphi round 1

Please score (on a scale from 1 to 5) which morphological abnormalities would contribute to the diagnosis of known tumor predisposition syndromes in the first screening of a patient.

1- no contribution to diagnosis tumor predisposition syndrome  
2  
3  
4  
5- pathognomonic for diagnosis tumor predisposition syndrome

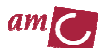

Academic Medical Center, Amsterdam  
Principal investigator: Prof. dr. R. C. M. Hennekam  
Co-investigators: dr. J. H. M. Merks, S. M. J. Hopman  
Version: 22nd of February 2011

| Morphological abnormality                        | Score for contribution to diagnosis tumor predisposition syndrome |
|--------------------------------------------------|-------------------------------------------------------------------|
| <b>STATURE</b>                                   | N/A                                                               |
| Short stature, proportionate                     |                                                                   |
| Short stature, short limbs                       |                                                                   |
| Short stature, short trunk                       |                                                                   |
| Tall stature, proportionate                      |                                                                   |
| Tall stature, disproportionate/dolichostenomelia |                                                                   |

| CRANIUM                          | N/A |
|----------------------------------|-----|
| Brachycephaly                    |     |
| Dolichocephaly/scaphocephaly     |     |
| Macrocephaly                     |     |
| Microcephaly                     |     |
| Plagiocephaly/asymmetrical skull |     |
| Trigonocephaly                   |     |
| Flat occiput                     |     |
| Prominent occiput                |     |
| Scalp defects                    |     |
| Scalp tumours                    |     |

| HAIR                                    | N/A |
|-----------------------------------------|-----|
| Brittle hair                            |     |
| Fine hair                               |     |
| Kinky/curly hair (including pili torti) |     |
| Coarse hair                             |     |
| Abnormal secondary sexual hair          |     |
| Unusual hair whorl/pattern              |     |

| EARS                            | N/A |
|---------------------------------|-----|
| Absent auditory canal           |     |
| Narrow/atretic auditory canal   |     |
| Pits of ear helix               |     |
| Crease/pits of ear lobule       |     |
| Temporal bone aplasia/dysplasia |     |
| Posterior helical pits          |     |

| EYES, GLOBES                    | N/A |
|---------------------------------|-----|
| Conjunctivitis                  |     |
| Conjunctival nodules            |     |
| Conjunctival telangiectasia     |     |
| Cloudy cornea/sclerocornea      |     |
| Keratoconus                     |     |
| Macrocornea/mesalocornea        |     |
| Visible nerve fibres on cornea  |     |
| Microcornea                     |     |
| Ulceration of cornea            |     |
| Microphthalmia                  |     |
| Iris atrophy/dysplasia          |     |
| Cataract                        |     |
| Persistent pupillary membrane   |     |
| Nevus of Ota                    |     |
| Vision, non-specific impairment |     |
| Blindness                       |     |
| Hypermetropia                   |     |
| Miopia                          |     |
| Nystagmus                       |     |
| Photophobia                     |     |
| Strabismus/gaze palsy           |     |

| EYES, ASSOCIATED STRUCTURES          | N/A |
|--------------------------------------|-----|
| Double eyelashes                     |     |
| Flame nevus of eyelids               |     |
| Ptosis of eyelids                    |     |
| Blocked/absent nasolacrimal duct     |     |
| Nasolacrimal duct, abnormal position |     |
| Increased tear production            |     |

| NOSE                  | N/A |
|-----------------------|-----|
| Deviated nasal septum |     |
| Nasal telangiectasia  |     |

| FACE                     | N/A |
|--------------------------|-----|
| Expressionless/dull face |     |
| Facial weakness          |     |
| Telangiectasia           |     |
| Asymmetrical maxilla     |     |
| Prominent maxilla        |     |

| MOUTH                 | N/A |
|-----------------------|-----|
| Open mouth appearance |     |
| Stomatitis            |     |
| Trismus               |     |

| <b>ORAL REGION</b>                       | <b>N/A</b> |
|------------------------------------------|------------|
| Oral tumour                              |            |
| Leukoplakia                              |            |
| Oral frenula (multiple)                  |            |
| Oral pigmentation                        |            |
| Thick/wide alveolar ridges               |            |
| Gingivitis                               |            |
| Gum hypertrophy                          |            |
| Periodontoclasia/periodontitis           |            |
| Cleft palate                             |            |
| Cleft uvula                              |            |
| High palate                              |            |
| Narrow palate                            |            |
| Prominent lateral palatine ridges        |            |
| Submucous cleft palate                   |            |
| Torus palatinus                          |            |
| Absent or hypoplastic tongue             |            |
| Bound tongue/ankyloglossia               |            |
| Midline cleft tongue                     |            |
| Furrowed tongue/prominent groove         |            |
| Glossoposis                              |            |
| Large tongue                             |            |
| Lobulated tongue (including hamartomata) |            |
| Protruding tongue                        |            |

| <b>TEETH</b>                        | <b>N/A</b> |
|-------------------------------------|------------|
| Advanced tooth eruption/development |            |
| Dental caries                       |            |
| Delayed tooth eruption/development  |            |
| Enamel abnormalities                |            |
| Irregular or crowded teeth          |            |
| Large/prominent teeth               |            |
| Malocclusion of teeth               |            |
| Neonatal teeth                      |            |
| Oligodontia                         |            |
| Premature loss of teeth             |            |
| Abnormally shaped teeth             |            |
| Small teeth                         |            |
| Single central incisor              |            |
| Talon cusp                          |            |
| Supernumerary teeth                 |            |
| Wide-spaced teeth                   |            |

| <b>VOICE</b>             | <b>N/A</b> |
|--------------------------|------------|
| Hoarse voice             |            |
| Nasal speech             |            |
| High-pitched voice       |            |
| Low-pitched voice        |            |
| Speech defect/dysarthria |            |
| Speech delay             |            |

| <b>NECK</b>                       | <b>N/A</b> |
|-----------------------------------|------------|
| Branchial cleft/sinus/cysts       |            |
| Low posterior/ident hairline      |            |
| Loose skin in neck                |            |
| Torticollis, including stiff neck |            |

| <b>BACK AND SPINE</b>       | <b>N/A</b> |
|-----------------------------|------------|
| Pilonidal cyst/sinus/dimple |            |
| Scotiosis                   |            |

| <b>THORAX</b>                   | <b>N/A</b> |
|---------------------------------|------------|
| Asymmetric thorax               |            |
| Short thorax                    |            |
| Short sternum                   |            |
| Stridor                         |            |
| Asteria or bifid sternum        |            |
| Gynaecomastia                   |            |
| Supernumerary nipples           |            |
| Wide-spaced nipples             |            |
| Absent or hypoplastic pectorals |            |
| Winged scapulae                 |            |

| <b>ABDOMEN</b>                      | <b>N/A</b> |
|-------------------------------------|------------|
| Diastasis recti                     |            |
| Inguinal hernia                     |            |
| Umbilical hernia                    |            |
| Abdominal muscle hypoplasia/aplasia |            |
| Abnormal placement of anus          |            |
| Anal fistula                        |            |

| <b>GENITALIA</b>               | <b>N/A</b> |
|--------------------------------|------------|
| Ambiguous/absent genitalia     |            |
| Female pseudo hermaphroditism  |            |
| Male pseudo hermaphroditism    |            |
| True hermaphroditism           |            |
| Hypogonadism                   |            |
| Abnormal genital pigmentation  |            |
| Prominent clitoris             |            |
| Abnormal labia                 |            |
| Early puberty in females       |            |
| Late puberty in females        |            |
| Hydrocele/lymphedema of testis |            |
| Hypospadias                    |            |
| Large penis                    |            |
| Small penis (including micro)  |            |
| Early puberty in male          |            |
| Late puberty in male           |            |
| Hypoplastic scrotum            |            |
| Overshining scrotum            |            |
| Absent testis                  |            |
| Cryptorchid testes             |            |
| Large testes                   |            |
| Small testes                   |            |
| Scrotum, bifid                 |            |

| UPPER LIMBS                                 | N/A |
|---------------------------------------------|-----|
| Asymmetric arms                             |     |
| Mesomelia of upper limbs                    |     |
| Rhizomelia of upper limbs                   |     |
| Proportionate short arms                    |     |
| Limited movement of shoulder                |     |
| Cubitus valgus                              |     |
| Dislocated elbow                            |     |
| Limited movement/flexion deformity of elbow |     |
| Madelung deformity                          |     |
| Restriction of supination/pronation         |     |

| HANDS                             | N/A |
|-----------------------------------|-----|
| Large hands                       |     |
| Small hands                       |     |
| Thenar hypoplasia                 |     |
| Abnormal dermatoglyphic patterns  |     |
| Hyper-mobile/extendible fingers   |     |
| Post-axial polydactyly of fingers |     |
| Limited movement of fingers       |     |
| Osseous syndactyly of fingers     |     |
| Short/hypoplastic metacarpals     |     |
| Synostosis of metacarpals         |     |
| Hypoplastic phalanges             |     |
| Short phalanges                   |     |
| Wide phalanges                    |     |
| Abducted/witchhiker thumb         |     |
| Fetal finger pads                 |     |

| NAILS              | N/A |
|--------------------|-----|
| Thickened nails    |     |
| Thin/brittle nails |     |

| LOWER LIMBS                            | N/A |
|----------------------------------------|-----|
| Asymmetric lower limbs                 |     |
| Hypertrophy of lower limb              |     |
| Mesomelia of lower limbs               |     |
| Oedema of lower limbs                  |     |
| Rhizomelia of lower limbs              |     |
| Proportionate shortening of lower limb |     |
| Flexion deformity of hip               |     |
| Coxa vara                              |     |
| Coxa valga                             |     |
| Absent or hypoplastic patella          |     |
| Dislocated patella                     |     |
| Dislocated knee                        |     |
| Hyper-extendible knees                 |     |
| Limited movement of ankle              |     |

| FEET                                         | N/A |
|----------------------------------------------|-----|
| Flat arches of feet                          |     |
| High arches of feet (pes cavus)              |     |
| Abnormal/deep plantar creases                |     |
| Abnormal dermatoglyphics on feet             |     |
| Large feet                                   |     |
| Small feet                                   |     |
| Vertical talus (see also rocker-bottom feet) |     |
| Hyper-mobile toes                            |     |

| ENDOCRINE                | N/A |
|--------------------------|-----|
| Ectopic/enlarged thyroid |     |

| MUSCLES                  | N/A |
|--------------------------|-----|
| Muscle atrophy           |     |
| Myotonia                 |     |
| Muscle weakness/myopathy |     |

| JOINTS                                 | N/A |
|----------------------------------------|-----|
| Contractures (including arthrogyposis) |     |
| Laxity                                 |     |
| Stiffness/arthritis                    |     |

| NEUROLOGY                              | N/A |
|----------------------------------------|-----|
| Anosmia                                |     |
| Ataxia                                 |     |
| Cranial nerve palsies                  |     |
| Dementia/psychosis                     |     |
| Extra-pyramidal disorder               |     |
| Hemiplegia                             |     |
| Hypotonia                              |     |
| Mental retardation/developmental delay |     |
| Spasticity/increased tendon reflex     |     |
| Tremors                                |     |

| SKELETAL         | N/A |
|------------------|-----|
| Hemi-hypertrophy |     |

| SKIN                                | N/A |
|-------------------------------------|-----|
| Cutis laxa                          |     |
| Dimples                             |     |
| Hypohidrotic or dry skin            |     |
| Hyperelastic skin                   |     |
| Hyperkeratosis                      |     |
| Keratosis pilaris                   |     |
| Seborrhea                           |     |
| Soft skin                           |     |
| Thick/stiff skin                    |     |
| Thin skin/generalized skin atrophy  |     |
| Scleroderma                         |     |
| Axillary freckles                   |     |
| Mongolian spot                      |     |
| Adenoma sebaceus                    |     |
| Cysts                               |     |
| Lipomata                            |     |
| Neurofibromas/schwannomas           |     |
| Pedunculated skin lesions/skin tags |     |
| Xanthomas                           |     |

Space for additional items (not listed above) which cannot reliably be distinguished on the 2D and/or 3D picture series, that you feel would contribute to the diagnosis of a known tumor predisposition syndrome

|  |
|--|
|  |
|  |
|  |

Please check whether you have put in a score for each item

Thank you very much for your help!
